# Supplementary material for: Machine Learning for Prediction of Immunotherapy Efficacy in Non-Small Cell Lung Cancer from Simple Clinical and Biological Data
Source: MDPI journal article supplement (doi:10.3390/cancers13246210), 2021-12-09

# Supplementary figures and tables

Table S1: Blood counts at ICI treatment start

Figure S1: Progression-free and overall survival

Table S2: Cox regression: progression-free survival

Table S3: Cox regression: overall survival

Figure S2: Learning curves

**Table S1: Blood counts at ICI treatment start**

| Variable    | Mean  | Median | Min  | Max   |
|-------------|-------|--------|------|-------|
| Basophils   | 0.04  | 0.03   | 0.00 | 0.80  |
| Derived NLR | 3.15  | 2.37   | 0.41 | 18.58 |
| Eosinophils | 0.16  | 0.11   | 0.00 | 3.26  |
| Hemoglobin  | 11.32 | 11.30  | 7.30 | 16.40 |
| Leucocytes  | 8.56  | 7.99   | 2.09 | 49.65 |
| Lymphocytes | 1.55  | 1.35   | 0.11 | 19.31 |
| Monocytes   | 0.63  | 0.58   | 0.07 | 1.96  |
| Neutrophils | 6.17  | 5.52   | 0.86 | 46.00 |
| NLR         | 5.66  | 3.85   | 0.46 | 96.91 |
| Platelets   | 317   | 290    | 57   | 2,013 |
| PLR         | 273   | 214    | 3    | 2,309 |

Figure S1: Progression-free and overall survival

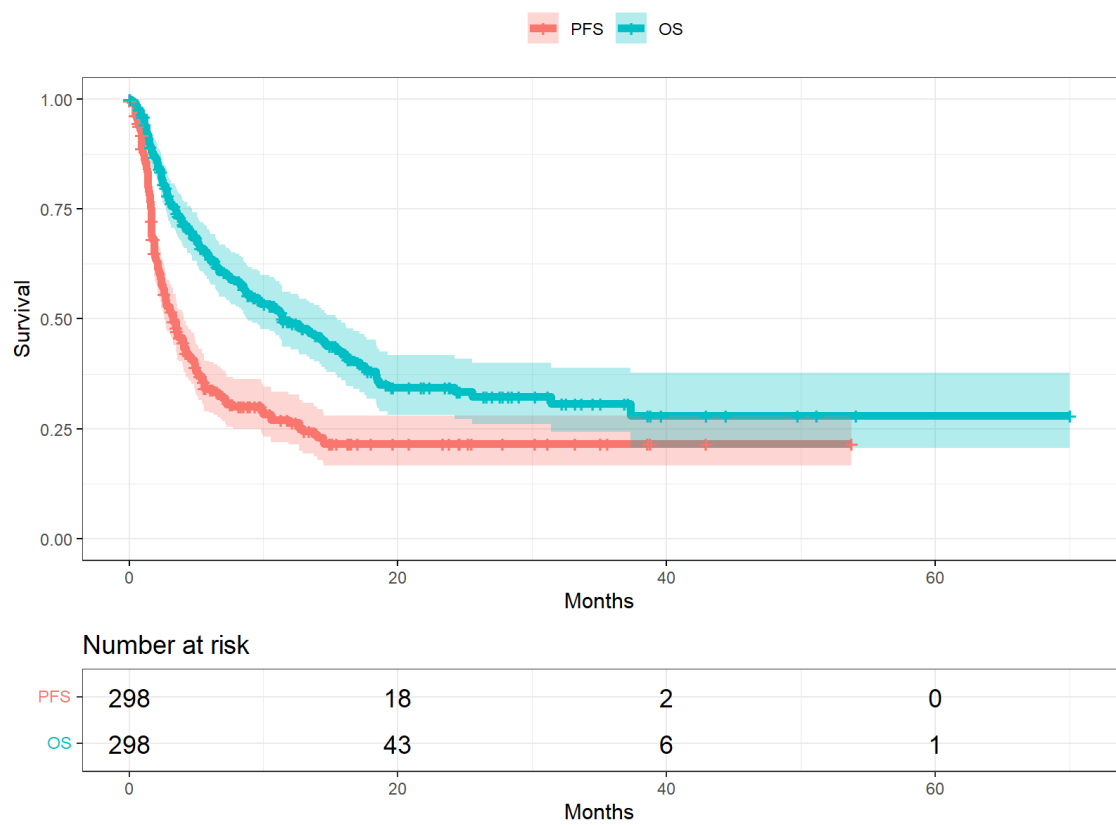

**Table S2: Cox regression: progression-free survival**

| Variable           | Univariable cox regression |          |        | Multivariable cox regression |          |        |
|--------------------|----------------------------|----------|--------|------------------------------|----------|--------|
|                    | Hazard ratio [95% IC]      | p        | signif | Hazard ratio [95% IC]        | p        | signif |
| Lymphocytes        | 0.85 [0.71, 1]             | 0.0912   | .      | 1 [0.38, 2.6]                | 0.996    |        |
| NLR                | 1 [1, 1]                   | 0.00585  | **     | 0.71 [0.33, 1.5]             | 0.376    |        |
| Platelets          | 1 [1, 1]                   | 0.37     |        | 0.81 [0.59, 1.1]             | 0.206    |        |
| PLR                | 1 [1, 1]                   | 0.881    |        | 1 [0.66, 1.5]                | 0.994    |        |
| Leukocytes         | 1.1 [1, 1.1]               | 0.00246  | **     | 0.69 [0.044, 11]             | 0.795    |        |
| Hemoglobin         | 0.9 [0.83, 0.97]           | 0.00525  | **     | 0.84 [0.72, 0.98]            | 0.0291   | *      |
| dNLR               | 1.1 [1, 1.1]               | 0.0017   | **     | 1.2 [0.69, 1.9]              | 0.596    |        |
| Neutrophils        | 1.1 [1, 1.1]               | 6.26e-05 | ***    | 2 [0.15, 26]                 | 0.603    |        |
| Monocytes          | 1.1 [0.66, 1.8]            | 0.774    |        | 1 [0.78, 1.3]                | 0.885    |        |
| Eosinophils        | 0.53 [0.23, 1.2]           | 0.138    |        | 0.96 [0.77, 1.2]             | 0.695    |        |
| Basophils          | 0.91 [0.14, 6.1]           | 0.923    |        | 0.99 [0.87, 1.1]             | 0.917    |        |
| BMI                | 0.96 [0.93, 0.99]          | 0.0133   | *      | 0.88 [0.76, 1]               | 0.088    | .      |
| Performance status | 2.1 [1.6, 2.9]             | 8.15e-07 | ***    | 1.3 [1.1, 1.5]               | 0.000335 | ***    |

**Table S3: Cox regression: overall survival**

| Variable           | Univariable cox regression |          |        | Multivariable cox regression |          |        |
|--------------------|----------------------------|----------|--------|------------------------------|----------|--------|
|                    | Hazard ratio [95% IC]      | p        | signif | Hazard ratio [95% IC]        | p        | signif |
| Lymphocytes        | 0.8 [0.64, 0.99]           | 0.045    | *      | 1.1 [0.4, 3.1]               | 0.845    |        |
| NLR                | 1 [1, 1.1]                 | 4.54e-08 | ***    | 0.87 [0.43, 1.7]             | 0.686    |        |
| Platelets          | 1 [1, 1]                   | 0.81     |        | 0.83 [0.58, 1.2]             | 0.305    |        |
| PLR                | 1 [1, 1]                   | 0.331    |        | 1 [0.65, 1.6]                | 0.949    |        |
| Leukocytes         | 1.1 [1, 1.1]               | 6.63e-07 | ***    | 0.99 [0.054, 18]             | 0.994    |        |
| Hemoglobin         | 0.83 [0.76, 0.91]          | 3.58e-05 | ***    | 0.76 [0.64, 0.92]            | 0.00392  | **     |
| dNLR               | 1.2 [1.1, 1.2]             | 8.93e-09 | ***    | 1.4 [0.83, 2.2]              | 0.225    |        |
| Neutrophils        | 1.1 [1.1, 1.1]             | 4.05e-10 | ***    | 1.3 [0.087, 19]              | 0.857    |        |
| Monocytes          | 1.4 [0.85, 2.3]            | 0.195    |        | 1.1 [0.82, 1.5]              | 0.558    |        |
| Eosinophils        | 0.13 [0.032, 0.54]         | 0.00509  | **     | 0.78 [0.55, 1.1]             | 0.166    |        |
| Basophils          | 0.72 [0.071, 7.4]          | 0.784    |        | 0.99 [0.84, 1.2]             | 0.943    |        |
| BMI                | 0.97 [0.93, 1]             | 0.0715   | .      | 0.93 [0.8, 1.1]              | 0.405    |        |
| Performance status | 2.8 [2, 3.9]               | 1.12e-09 | ***    | 1.4 [1.2, 1.6]               | 3.68e-05 | ***    |

**Figure S2: Learning curves**

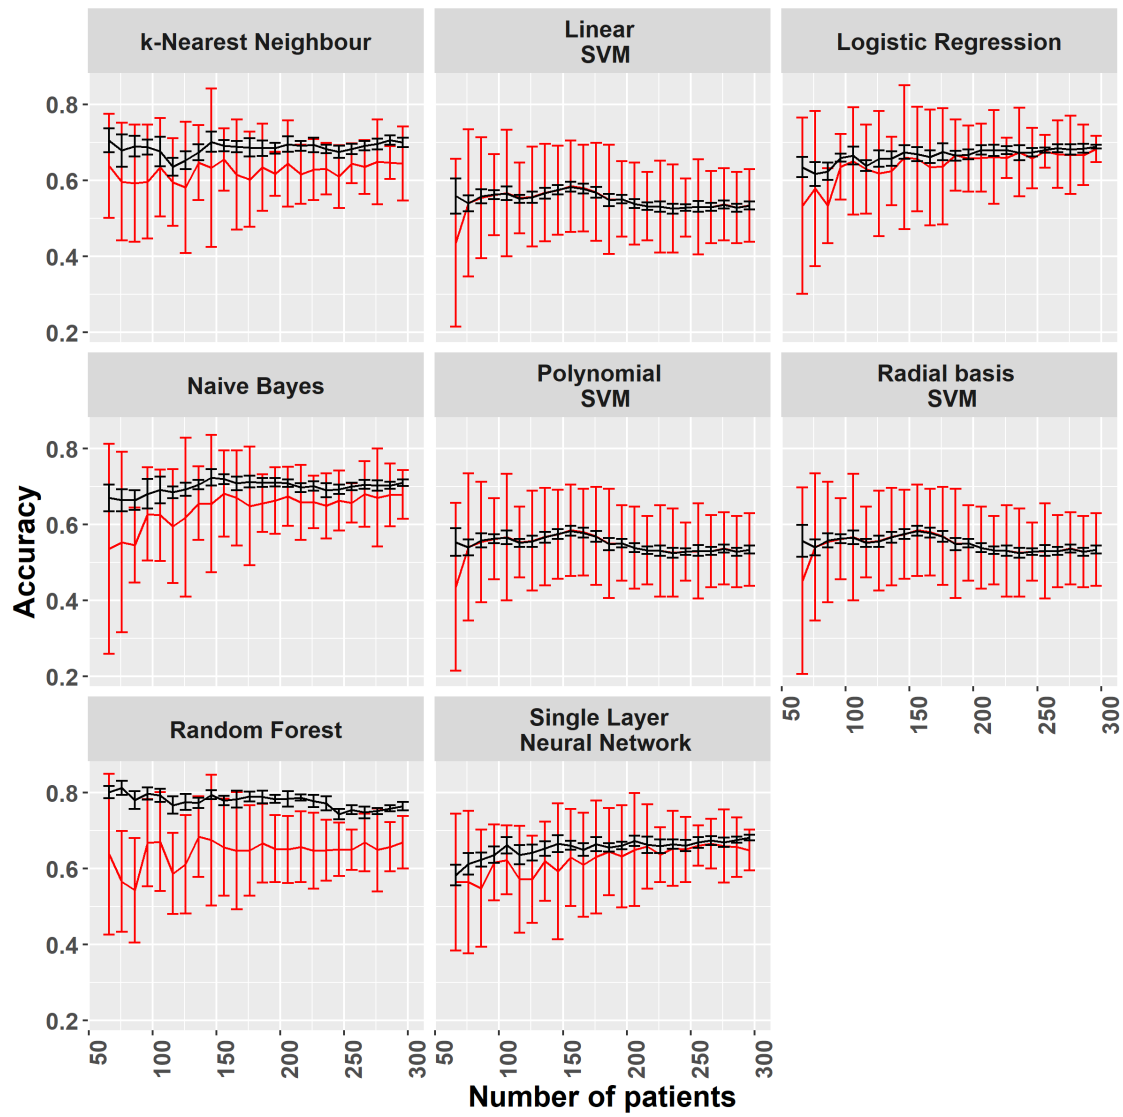

Supplement: s1 [file s1]
